# Supplementary material for: A novel electrochemical sugar recognition system using a ruthenium complex and phenylboronic acid assembled on gold nanoparticles
Source: Royal Society of Chemistry journal article supplement (doi:10.1039/c4ay01716a), 2014-01-01
Supplement: c4ay01716a1.pdf [file c4ay01716a1.pdf]

Cite this: DOI: 10.1039/c0xx00000x

www.rsc.org/xxxxxxx

ARTICLE TYPE

Electronic Supplementary Information for

## Novel electrochemical sugar recognition system using ruthenium complex and phenylboronic acid assembled on gold nanoparticles

Akira Endo,\* Masamitsu Kimura, Takeshi Hashimoto and Takashi Hayashita

### Synthesis of the complexes and ligands

Hacac-(CH<sub>2</sub>)<sub>8</sub>-I: Hacac (6.8 g, 0.068 mol), diiodoctane (25 g, 0.068 mol), and K<sub>2</sub>CO<sub>3</sub> (9.4 g, 0.17 mol) were dissolved in 100 cm<sup>3</sup> of acetone dried over 3A molecular sieves and refluxed for 72 h. Evaporation of the solvent provided a yellow oily substance. Yield: 63.2% (14.5 g, 0.043 mol) EI-MS: *m/z* = 338.

[Ru<sup>III</sup>(acac)<sub>2</sub>(acac-(CH<sub>2</sub>)<sub>8</sub>I)]: [Ru<sup>II</sup>(acac)<sub>2</sub>(AN)<sub>2</sub>] (1.00 g, 2.62 mmol) and Hacac-(CH<sub>2</sub>)<sub>8</sub>-I (2.47 g, 7.30 mmol) were dissolved in 100 cm<sup>3</sup> of ethanol. The solution was refluxed for 5 h. Then, additional Hacac-(CH<sub>2</sub>)<sub>8</sub>-I (0.83 g, 2.45 mmol) was added and reflux was continued for 18.5 h. The crude product was purified by column chromatography (silica gel/BZ:AN = 20:1 v/v%). The second fraction was separated and dark red crystals were obtained by evaporation of the solvent. Yield: 9.77% (0.163 g, 0.256 mmol) FAB-MS: *m/z* = 636.5 (M<sup>+</sup>).

[Ru<sup>III</sup>(acac)<sub>2</sub>(acac-(CH<sub>2</sub>)<sub>8</sub>SH)]: [Ru<sup>III</sup>(acac)<sub>2</sub>(acac-(CH<sub>2</sub>)<sub>8</sub>I)] (0.163 g, 0.256 mmol) was dissolved in 20 cm<sup>3</sup> of acetonitrile and then 0.058 g (0.762 mmol) of thiourea was added. The solution was refluxed for 18 h. The crude product obtained by evaporation of the solvent was dissolved in a small amount of acetonitrile. Then, 20 cm<sup>3</sup> of water and ca. 5 cm<sup>3</sup> of 0.16 mol dm<sup>-3</sup> KOH solution were added to the solution and the mixture was refluxed for 2 h. The crude product was purified by column chromatography (silica gel/hexane:ethyl acetate = 1:2 v/v%). The first fraction was separated and again purified by column chromatography (silica gel/hexane:ethyl acetate = 1:1 v/v%). Dark red crystals were obtained by evaporation of the solvent. Yield: 3.7% (5.15 mg, 9.45 × 10<sup>-6</sup> mol) FAB-MS: *m/z* = 545.

### Reagents

Sugars (D-fructose, D-glucose, and D-galactose) were purchased from Wako Pure Chemical Industries Ltd. For synthetic experiments, commercially available reagent grade solvents were used and dehydrated by molecular sieves before use. For the preparation of GNPs, HAuCl<sub>4</sub> · 3H<sub>2</sub>O was used from Wako Pure Chemical Industries Ltd.

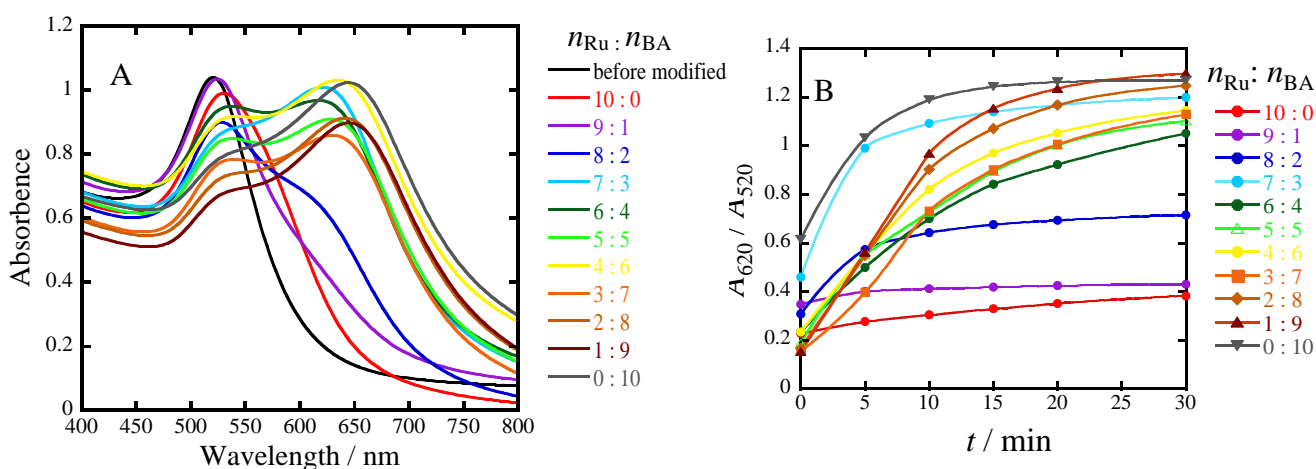

Fig. S1 A) UV-vis spectra of GNPs modified with various ratios of Ru0 and B0. B) Time dependence of Δ(A<sub>620</sub>/A<sub>520</sub>) of GNP before modification with Ru0 and B0 at Ru0:B0 = 10:0, 9:1, 8:2, 7:3, 6:4, 5:5, 4:6, 3:7, 2:8, 1:9, 0:10.

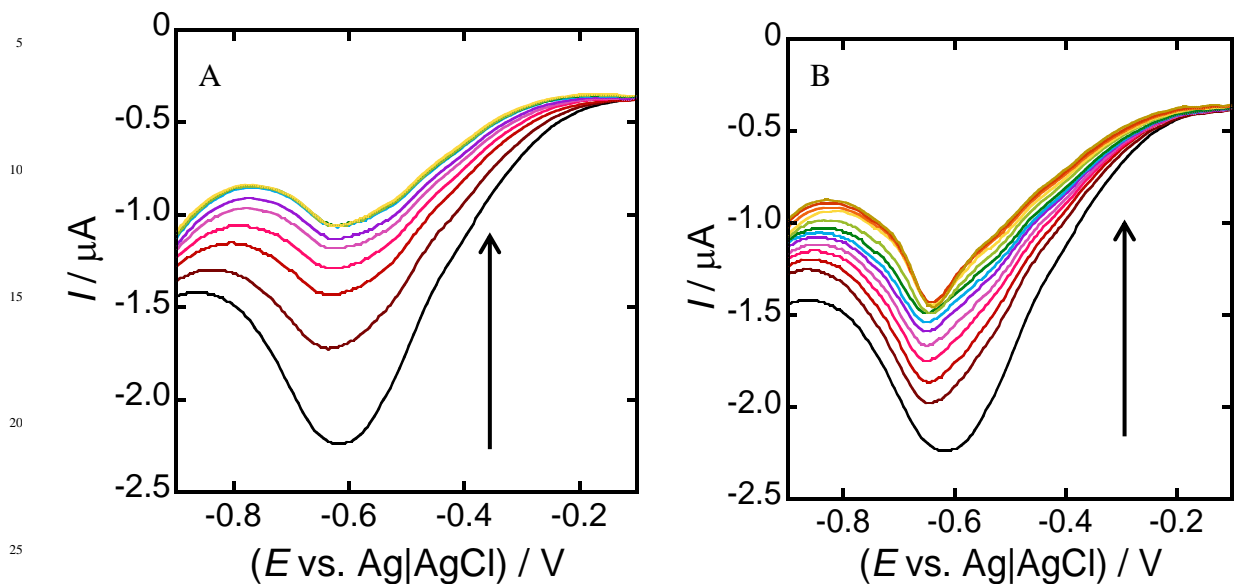

Fig. S2 DPV of **Ru8/B10/GNP** complexes in  $0.1 \text{ mol dm}^{-3} \text{ NaClO}_4$ -( $\text{H}_2\text{O}:\text{EtOH} = 3:1$ ) at glassy carbon electrode ( $\phi = 3 \text{ mm}$ ) under Ar with addition of D-fructose (A) and D-galactose (B). [D-fructose]: A; 0, 0.5, 1.0, 2.5, 5.0, 7.5, 10, 25, 50  $\mu\text{mol dm}^{-3}$ , B; 0, 0.5, 1.0, 2.5, 5.0, 7.5, 10, 25, 50, 100, 150  $\mu\text{mol dm}^{-3}$ .

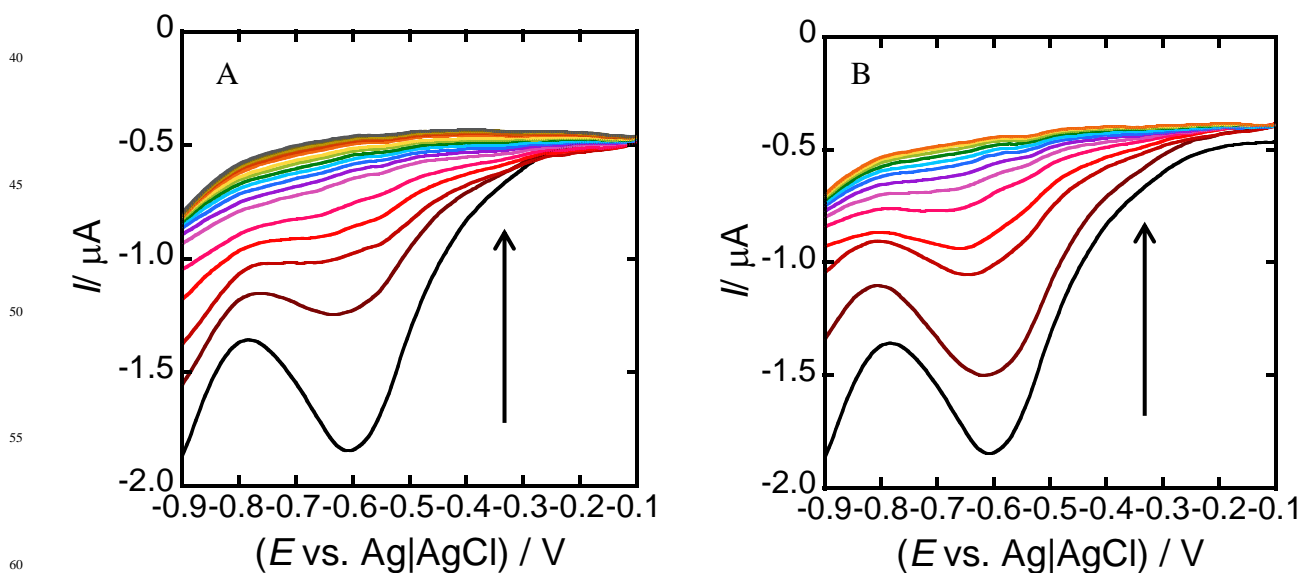

Fig. S3 DPV of **Ru0/B0/GNP** complexes in  $0.1 \text{ mol dm}^{-3} \text{ NaClO}_4$ -( $\text{H}_2\text{O}:\text{EtOH} = 3:1$ ) at a glassy carbon electrode ( $\phi = 3 \text{ mm}$ ) under Ar upon the addition of D-fructose (A) or D-galactose (B). [D-fructose]: A; 0, 0.5, 1.0, 2.5, 5.0, 7.5, 10, 25, 50, 100, 150, 250, 500  $\mu\text{mol dm}^{-3}$ , B; 0, 0.5, 1.0, 2.5, 5.0, 7.5, 10, 25, 50, 100, 150, 250, 500  $\mu\text{mol dm}^{-3}$ .

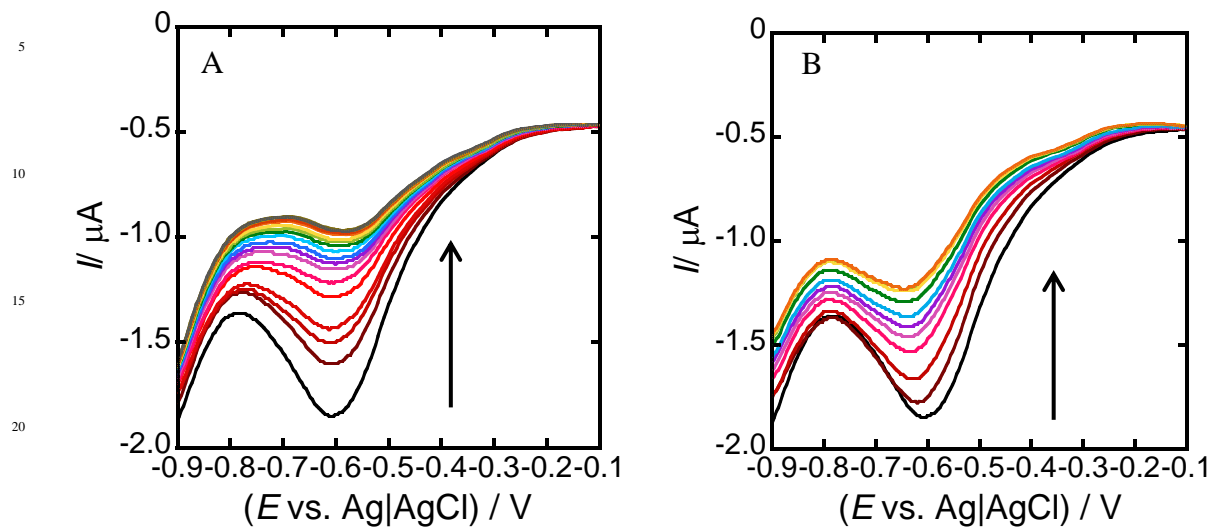

Fig. S4 DPV of **Ru0/B10/GNP** complexes in  $0.1 \text{ mol dm}^{-3} \text{ NaClO}_4\text{-(H}_2\text{O:EtOH = 3:1)}$  at a glassy carbon electrode ( $\phi = 3 \text{ mm}$ ) under Ar upon the addition of D-fructose (A) or D-galactose (B). [D-fructose]: A; 0, 0.5, 1.0, 2.5, 5.0, 7.5, 10, 25, 50, 100, 150, 250, 500,  $750 \mu\text{mol dm}^{-3}$ , B; 0, 0.5, 1.0, 2.5, 5.0, 7.5, 10, 25, 50, 100  $\mu\text{mol dm}^{-3}$ .

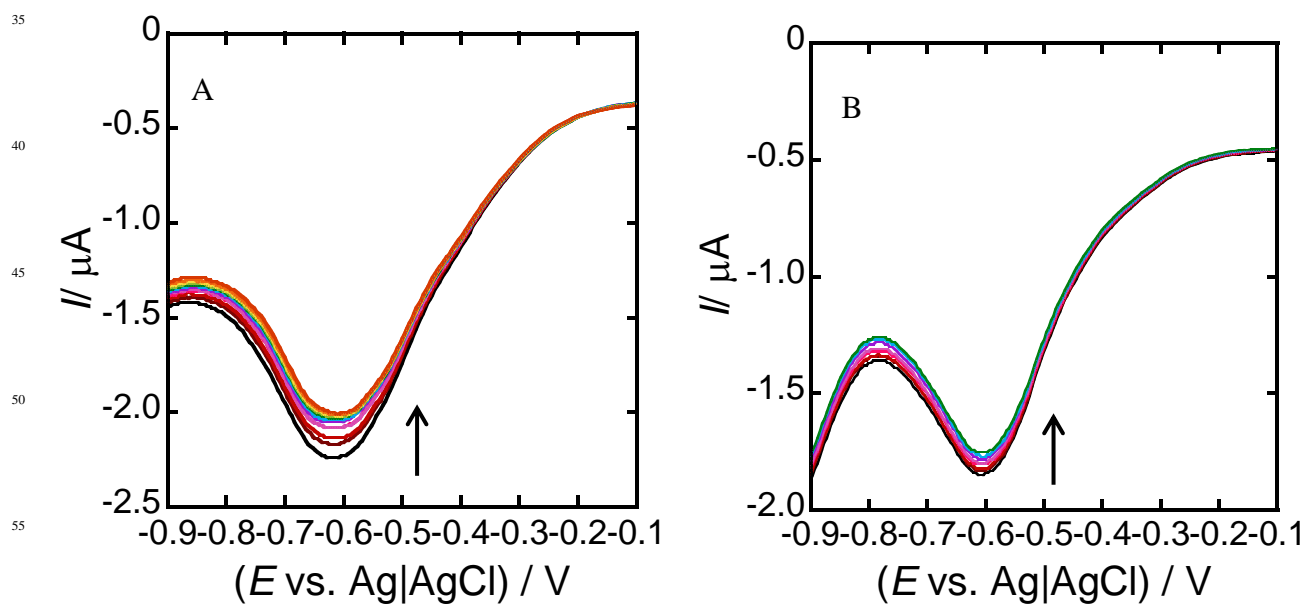

Fig. S5 DPV of **Ru8/B0/GNP** complexes in  $0.1 \text{ mol dm}^{-3} \text{ NaClO}_4\text{-(H}_2\text{O:EtOH = 3:1)}$  at a glassy carbon electrode ( $\phi = 3 \text{ mm}$ ) under Ar following the addition of D-fructose (A) or D-galactose (B). [D-fructose]: A; 0, 0.5, 1.0, 2.5, 5.0, 7.5, 10, 25, 50, 100, 150, 250  $\mu\text{mol dm}^{-3}$ , B; 0, 0.5, 1.0, 2.5, 5.0, 7.5, 10, 25, 50, 100, 150, 250  $\mu\text{mol dm}^{-3}$ .

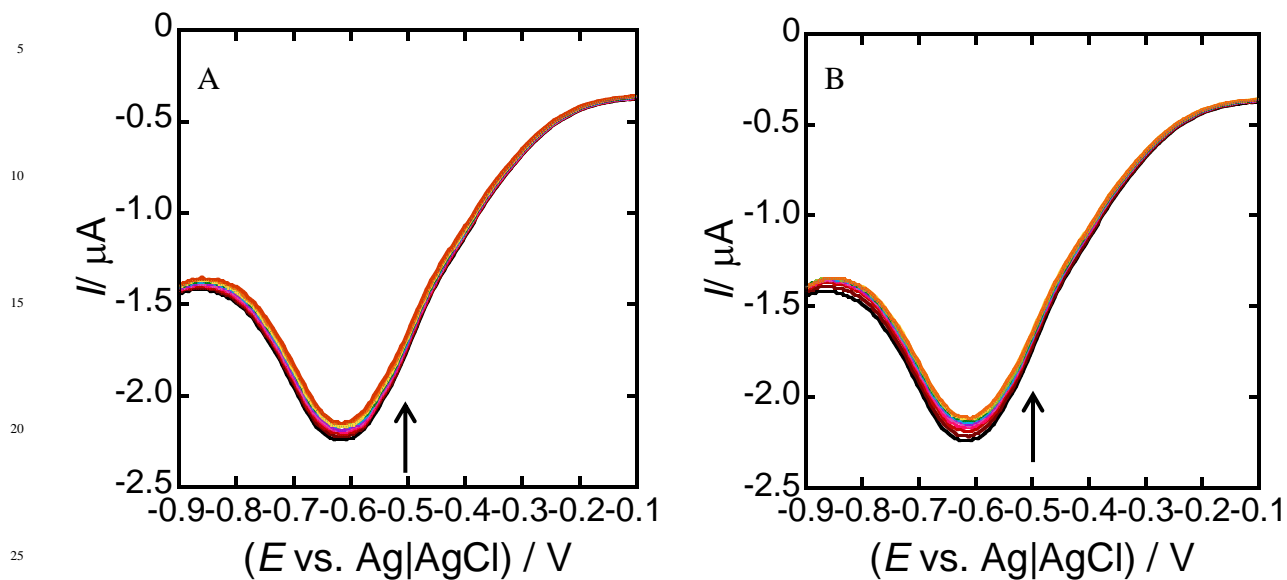

Fig. S6 DPV of **Ru8/GNP** complexes in  $0.1 \text{ mol dm}^{-3} \text{ NaClO}_4\text{-}(\text{H}_2\text{O}:\text{EtOH} = 3:1)$  at a glassy carbon electrode ( $\phi = 3 \text{ mm}$ ) under Ar following the addition of D-fructose (A) or D-galactose (B). [D-fructose]: A; 0, 0.5, 1.0, 2.5, 5.0, 7.5, 10, 25, 50, 100, 150, 250  $\mu\text{mol dm}^{-3}$ , B; 0, 0.5, 1.0, 2.5, 5.0, 7.5, 10, 25, 50, 100, 150, 250  $\mu\text{mol dm}^{-3}$ .

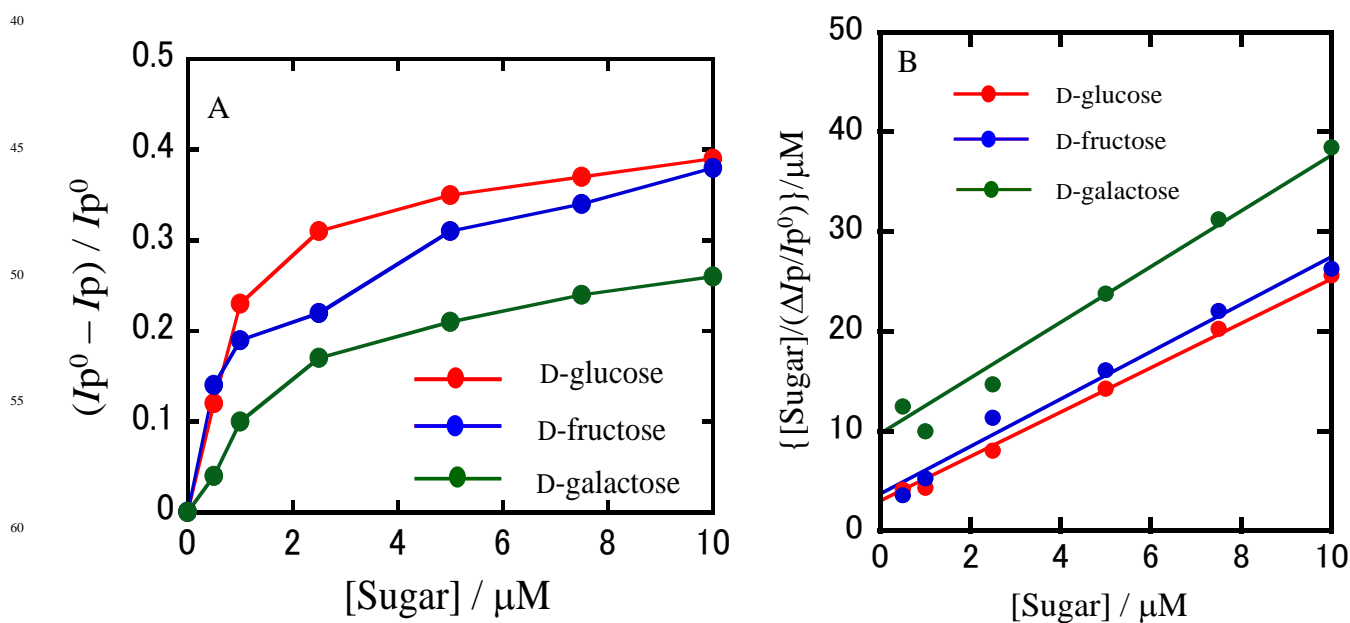

Fig. S7 A plot of  $\{(I_p^0 - I_p)/I_p^0\}$  vs. [Sugar] (A) and a plot of  $\{[Sugar]/(\Delta I_p/I_p^0)\}$  vs. [Sugar] (B) for the **Ru0/B10/GNP** complex

5

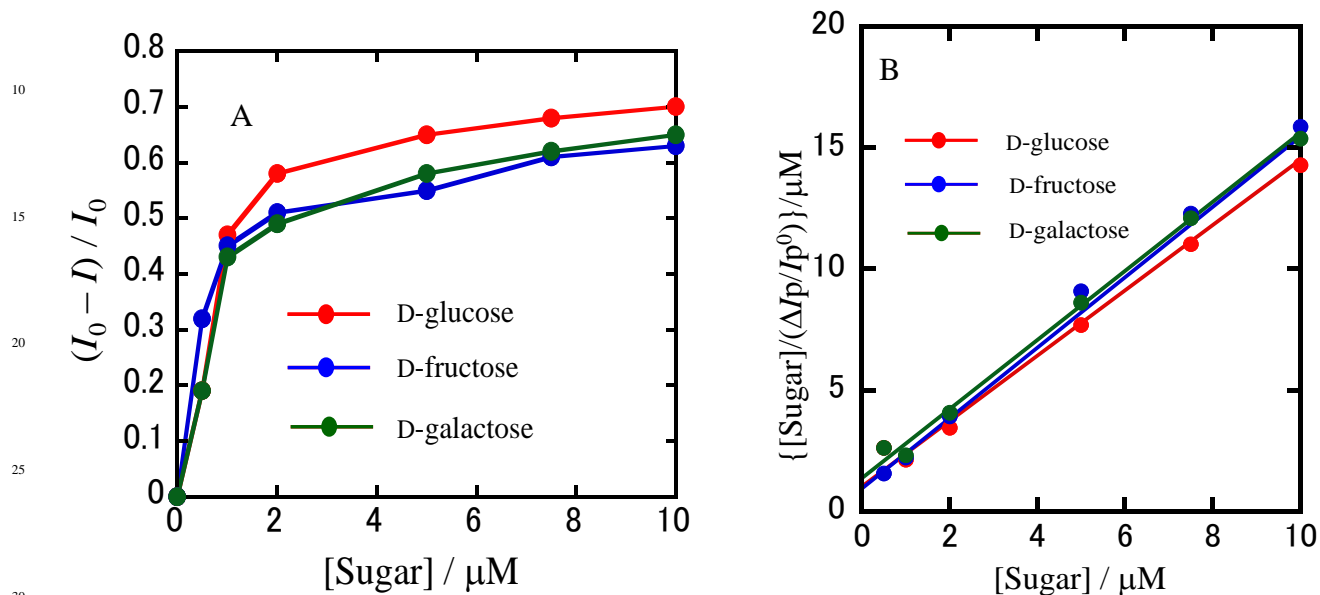

Figure S8. A plot of  $\{(I_p^0 - I_p) / I_p^0\}$  vs.  $[\text{Sugar}]$  (A) and a plot of  $\{[\text{Sugar}] / (\Delta I_p / I_p^0)\}$  vs.  $[\text{Sugar}]$  (B) for the **Ru<sub>0</sub>/B<sub>0</sub>/GNP** complex

35

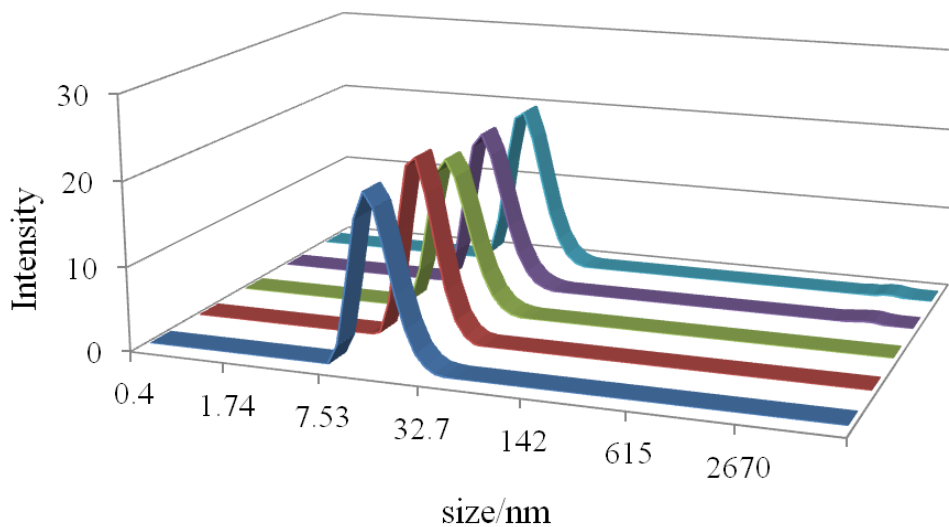

Fig. S9 Particle diameter measurement of gold nanoparticles by DLS by using Zetasizer Nano-ZS (Malvern Instrument Ltd.).

40
